# Supplementary material for: Bile acid-FXRα pathways regulate male sexual maturation in mice
Source: PubMed Central journal article supplement (PMC4991395; doi:10.18632/oncotarget.7153), 2016-02-03
Supplement: oncotarget-07-19468-s001.pdf [file oncotarget-07-19468-s001.pdf]

## SUPPLEMENTARY FIGURES AND TABLE

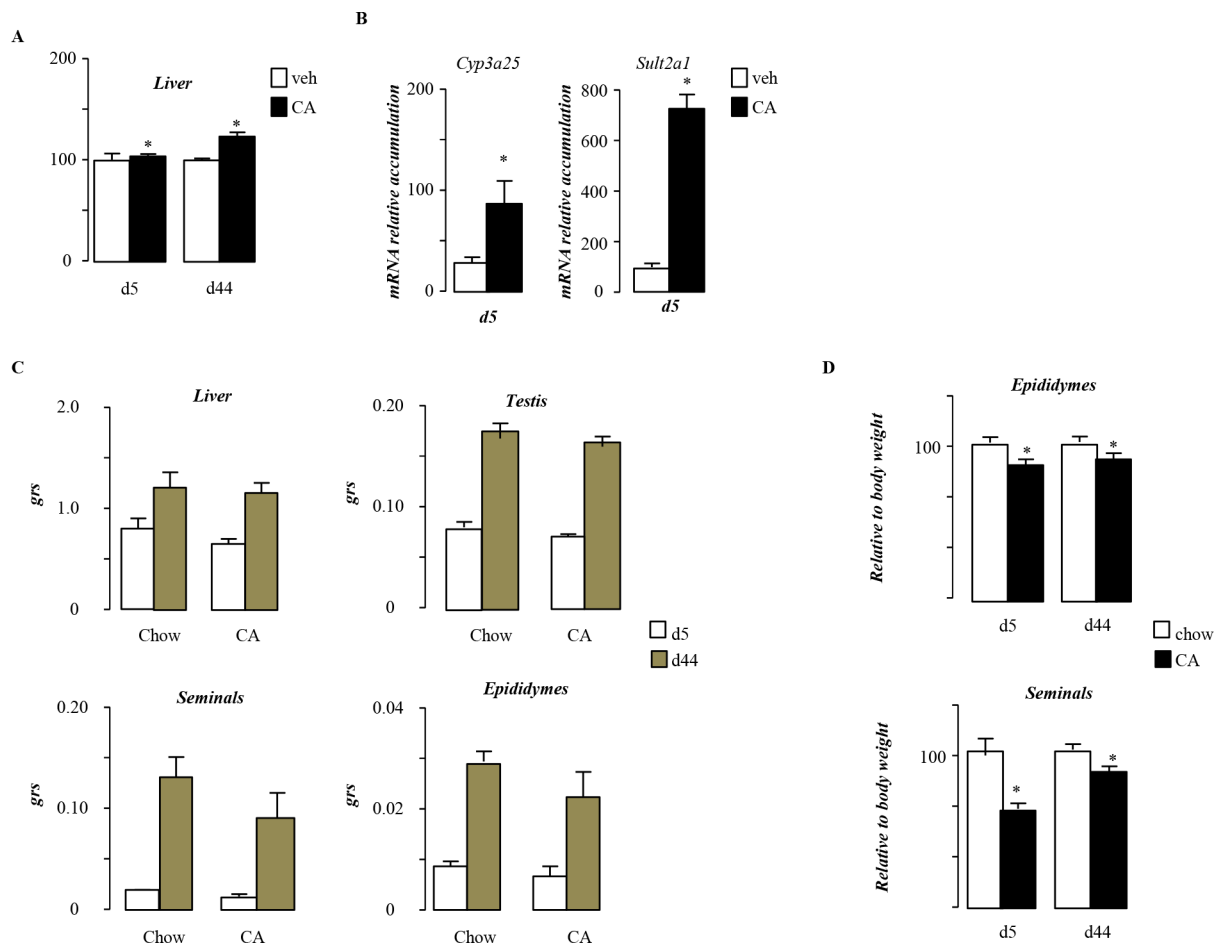

**Supplementary Figure S1:** A. Liver weights in C57Bl/6J mice fed 5 or 44 days of exposure. B. Liver mRNA expression of *Cyp3a25* and *Sult2a1* normalized to  $\beta$ -actin levels in whole testis of C57Bl/6J mice fed control or CA diets for 44 days (n= 5 to 6per group). C. Liver, testis, seminals and epididymes gross weights at 5 days and 44 days after the beginning of the treatment. D. Seminals and epididymes weights relative to body weight at 5 days and 44 days after the beginning of the treatment. In all panels control diet treated mice were arbitrarily fixed at 100% and data are expressed as means  $\pm$  SEM. Statistical analysis:\*, p<0.05; \*\*, p<0.01, \*\*\*, p<0.005 vs. control diet group.

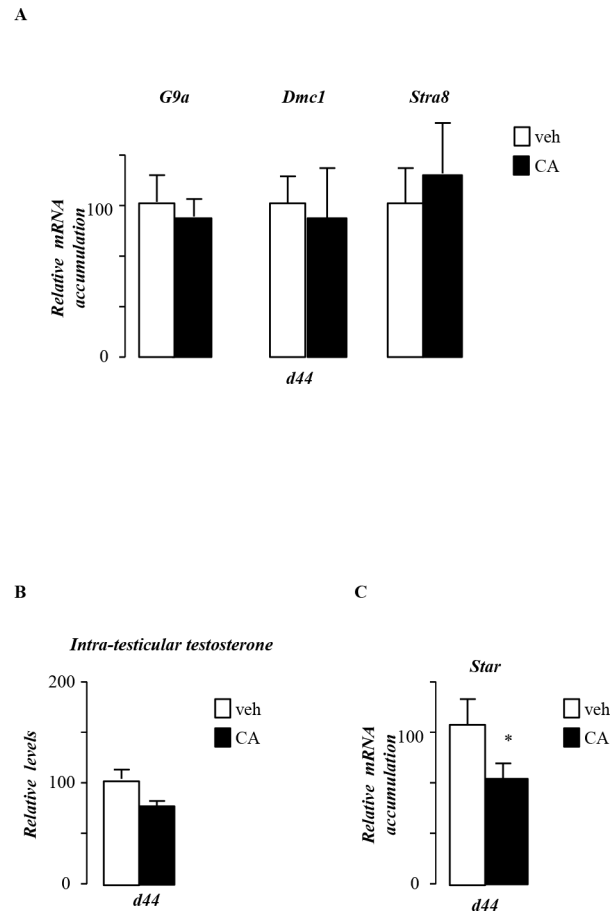

**Supplementary Figure S2:** **A.** Testicular mRNA expression of *G9a*, *Dmc1* and *Stra8* normalized to  $\beta$ -actin in C57Bl/6J mice fed 44 days with control or CA diets (n= 5–10 per group). **B.** Relative intra-testicular testosterone levels in C57Bl/6J mice fed control or CA diet for 44 days (n= 6–20 per group). **C.** Testicular mRNA expression of *Star* normalized to  $\beta$ -actin levels in whole testis of C57Bl/6J mice treated 44 days with CA-diet (n= 5 to 6per group).

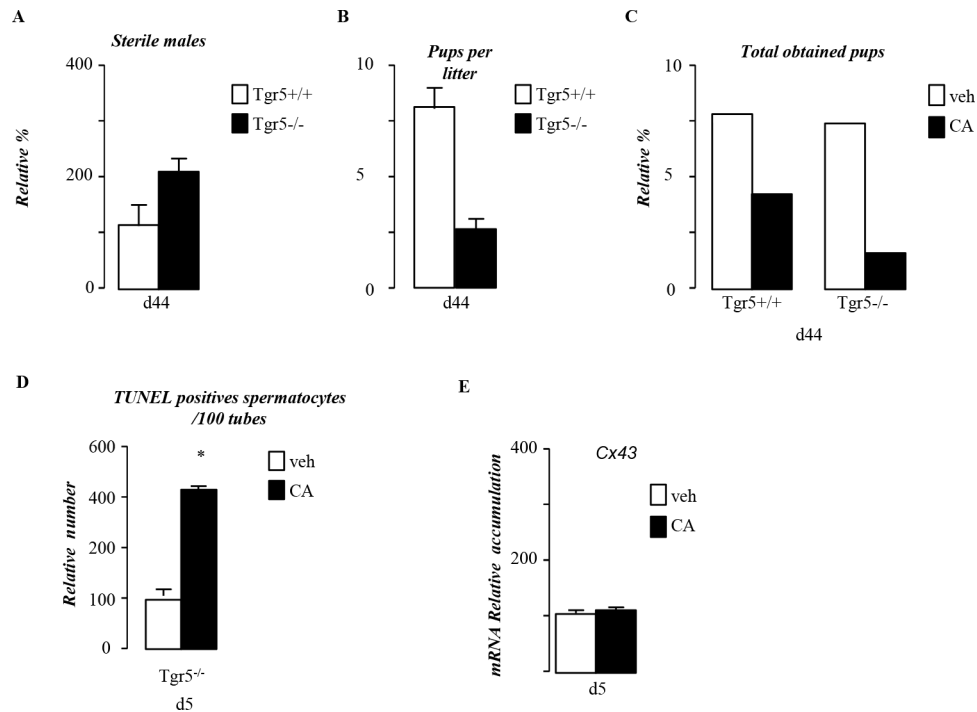

**Supplementary Figure S3:** **A.** Percentage of infertile males in Tgr5<sup>+/+</sup> and Tgr5<sup>-/-</sup> exposed to CA diet for 44 days. **B.** Number of pups per litter per males in Tgr5<sup>+/+</sup> and Tgr5<sup>-/-</sup> exposed to CA diet for 44 days. **C.** Total number of pups obtained per group in Tgr5<sup>+/+</sup> and Tgr5<sup>-/-</sup> exposed to control or CA diet for 44 days. **D.** Quantification of TUNEL analyses in Tgr5<sup>-/-</sup> males fed control or CA diets for 5 days. The number of TUNEL-positive spermatocytes is indicated as the number of positive cells per 100 seminiferous tubules (n= 6–10). **E.** Testicular mRNA expression of *Cx43* normalized to  $\beta$ -actin in C57Bl/6J mice fed 5 days with control or CA diets (n= 5–10 per group). In all of the panels data are expressed as the means  $\pm$  SEM. Statistical analysis: \*, p<0.05; \*\*, p<0.01, \*\*\*, p<0.005 vs. respective control group.

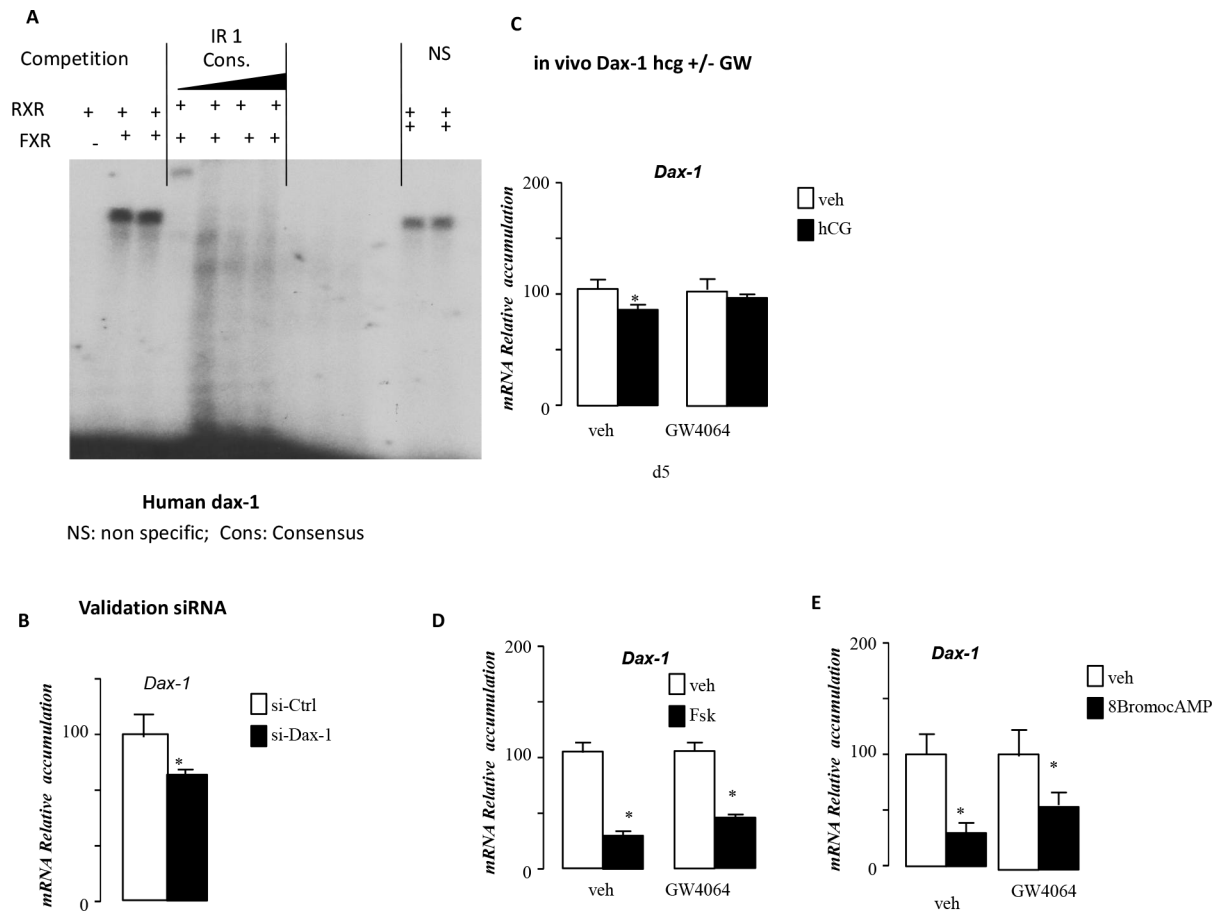

**Supplementary Figure S4:** **A.** Electromobility shift assays were performed with  $^{32}\text{P}$ -labeled FXRE and *in vitro*-transcribed hFXR $\alpha$  and/or human RXR $\alpha$ . Competitions were performed using unlabeled nucleotides at 200-fold molar excess of IR1-hFGF19 or a non-specific sequence (LXRE abca1). **B.** mRNA expression of *Dax-1* normalized to  $\beta$ -actin levels in MA10 cells after 48 hours of transfection with siRNA-control or siRNA directed against *Dax-1* (n= 10 to 15 per group). **C.** testicular mRNA expression of *Dax-1* in C57Bl/6J mice treated 5 days with vehicle, GW4064 and then 12 hours with veh or hCG; vehicle group was set arbitrarily as 100% (n= 5–15 per group). **D.** mRNA expression of *dax-1* normalized to  $\beta$ -actin levels in MA10 cells pre-treated 12 h with vehicle or GW4064 and then 4 hours with veh or Fsk (n= 5–15 per group); vehicle group was set arbitrarily as 100%. **E.** mRNA expression of *Dax-1* normalized to  $\beta$ -actin levels in MA10 cells pre-treated 12 h with vehicle or GW4064 and then 4 hours with veh or 8bromo-cAMP (n= 5–15 per group); vehicle group was set arbitrarily as 100%.

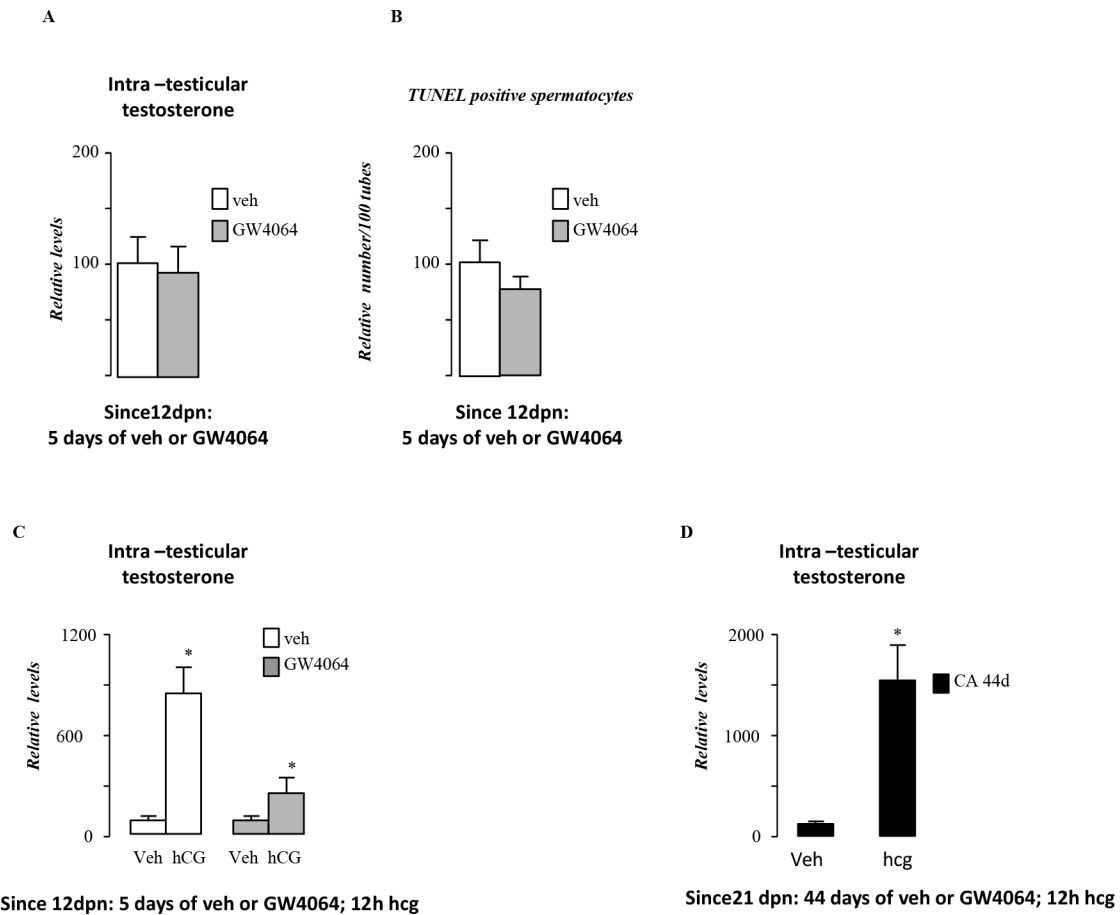

**Supplementary Figure S5:** **A.** Relative intra-testicular testosterone levels in 12 days old C57Bl/6J mice fed control GW4064 for 5 days (n= 6–10 per group). **B.** Quantification of TUNEL analyses in 12 days old C57Bl6 males fed control or GW4064 for 5 days. The number of TUNEL-positive spermatocytes is indicated as the number of positive cells per 100 seminiferous tubules (n= 6–10). **C.** Relative intra-testicular testosterone levels in 12 days old C57Bl/6J mice treated 5 days with vehicle, GW4064 and then 12 hours with vehicle or hCG (n= 5–15 per group). **D.** Relative intra-testicular testosterone levels in 21 days old C57Bl/6J mice fed 44 days with control or CA diets and then 12 hours with vehicle or hCG (n= 5–15 per group). In all of the panels Control diet or vehicle treated mice were arbitrarily fixed at 100% and data are expressed as the means  $\pm$  SEM. Statistical analysis: \*,  $p < 0.05$ ; \*\*,  $p < 0.01$ , \*\*\*,  $p < 0.005$  vs. control diet group.

**Supplementary Table S1: Q-PCR Primers list**

G9a, Dmc1, Stra8, were from volle et al. [1] of {11}

---

|        |     |                             |
|--------|-----|-----------------------------|
| Actine | FW  | TCATCACTATTGGCAACGAGC       |
|        | Rev | AGTTTCATGGATGCCACAGG        |
| Lhcgr  | FW  | AGCTAATGCCTTTGACAACC        |
|        | Rev | GATGGACTCATTATTCATCC        |
| Star   | FW  | TGTCAAGGAGATCAAGGTCCTG      |
|        | Rev | CGATAGGACCTGGTTGATGAT       |
| Nr0b2  | FW  | CTTTCTGGAGCCTTGAGCTGG       |
|        | Rev | GTTGAAGAGGATCGTGCCCTT       |
| Nr5a1  | FW  | TGCAGAATGGCCGACCAG          |
|        | Rev | TGGCGGTAGATGTGGTC           |
| Nr5a2  | FW  | CTCTTGATTCTCGATCACATTTACC   |
|        | Rev | CCAGGAACCTGAGACATACAAATC    |
| Nr0b1  | FW  | <i>TGCACTTCGAGATGATGGAG</i> |
|        | Rev | <i>ATCTGCTGGGTTCTCCACTG</i> |
| Prm2   | FW  | CCAGTGAGGGTCAGCACCAG        |
|        | Rev | TCTGCAGCCTCTGCGATGCC        |

---
